# Supplementary material
Source: HighWire-hosted journal article supplement (https://sit.bmj.com/highwire/filestream/494/field_highwire_adjunct_files/1/bmjsit-2021-000085supp002_data_supplement.pdf)
Supplement: bmjsit-2021-000085supp002_data_supplement.pdf [file bmjsit-2021-000085supp002_data_supplement.pdf]

### VQI Endovascular AAA Repair Inclusion Criteria:

**Endovascular AAA Repair:**

**Inclusion:** Primary endovascular repair of degenerative infrarenal aortic aneurysms that may include iliac aneurysms. Uncovered stent grafts extending above the renal arteries are included.

**Exclusions:**

- Revision of previous endografts (which is captured on the follow-up form for that procedure).
- Supra-renal covered stents with renal fenestrations or branches (which are entered under TEVAR/Complex EVAR).
- Isolated iliac aneurysms if the endograft is not placed within the aorta, which are captured as peripheral vascular interventions.
- Operations done for infected aneurysms.
- Operations done for anastomotic aneurysm (Pseudoaneurysm) after previous open repair.
- EVAR performed for non-aneurysmal infrarenal pathology, such as isolated dissection or atherosclerotic occlusive disease (the latter is captured under PVI, the former is not captured in the VQI registry).
- Repair done for trauma

Available at:

<https://www.vqi.org/wp-content/uploads/2014-VQI-Procedure-Inclusion-Criteria-rev0814.pdf>
